# Supplementary material
Source: HighWire-hosted journal article supplement (http://www.qdcxjkg.com/highwire/filestream/132732/field_highwire_adjunct_files/0/ERJ-00154-2016_supplementary_table_S1.pdf)
Supplement: ERJ-00154-2016_supplementary_table_S1.pdf [file ERJ-00154-2016_supplementary_table_S1.pdf]

Supplementary table S1

| Disease                         | ICD codes |
|---------------------------------|-----------|
| Arterial Hypertension           | I10, I11  |
| Congestive Heart Failure        | I50       |
| Ischemic Heart Disease          | I25       |
| Chronic Kidney Disease          | N18       |
| Depression                      | F32, F33  |
| Diabetes                        | E11, E14  |
| Osteoporosis                    | M81       |
| Gastroesophageal Reflux Disease | K21       |
| Lung Cancer                     | C34       |

***The table provides the ICD-10 diagnostic codes that have been used to define comorbidities.***
